# Supplementary material for: Dexamethasone in Vietnamese Adolescents and Adults with Bacterial Meningitis
Source: Atypon-hosted journal article supplement (doi:10.1056/nejmoa070852), 2007-12-12
Supplement: nejm_mai_2431sa1.pdf [file nejm_mai_2431sa1.pdf]

## Supplementary Appendix

This appendix has been provided by the authors to give readers additional information about their work.

Supplement to: Mai NTH, Chau TTH, Thwaites G, et al. Dexamethasone in Vietnamese adolescents and adults with bacterial meningitis. *N Engl J Med* 2007;357:2431-40.

## Supplementary table

Comparison of the baseline clinical variables in patients in different diagnostic categories

| Variable                   | Immediate confirmation of bacterial meningitis <sup>a</sup><br>N=230<br><i>Median/range or number/percentage and denominator</i> | Delayed confirmation of bacterial meningitis <sup>b</sup><br>N=70<br><i>Median/range or number/percentage and denominator</i> | Probable bacterial meningitis <sup>c</sup><br>N=123<br><i>Median/range or number/percentage and denominator</i> | Confirmed tuberculous meningitis <sup>d</sup><br>N=9<br><i>Median/range or number/percentage and denominator</i> | Alternative diagnosis <sup>e</sup><br>N=3<br><i>Median/range or number/percentage and denominator</i> | P value <sup>f</sup> |
|----------------------------|----------------------------------------------------------------------------------------------------------------------------------|-------------------------------------------------------------------------------------------------------------------------------|-----------------------------------------------------------------------------------------------------------------|------------------------------------------------------------------------------------------------------------------|-------------------------------------------------------------------------------------------------------|----------------------|
| Age (years)                | 42 (15-91) 229                                                                                                                   | 44 (17-78) 69                                                                                                                 | 40 (15-85) 123                                                                                                  | 39 (16-64) 9                                                                                                     | 22 (19-25) 3                                                                                          | 0.177                |
| Male sex                   | 175 (76.1) 230                                                                                                                   | 44 (62.9) 70                                                                                                                  | 89 (72.4) 123                                                                                                   | 4 (66.7) 9                                                                                                       | 2 (66.7) 3                                                                                            | 0.291                |
| Duration of illness (days) | 3 (1-28) 223                                                                                                                     | 4 (1-20) 68                                                                                                                   | 4 (1-30) 122                                                                                                    | 10 (3-19) 8                                                                                                      | 7 (6-7) 2                                                                                             | 0.019                |

|                                        |                      |                     |                      |                    |                    |       |
|----------------------------------------|----------------------|---------------------|----------------------|--------------------|--------------------|-------|
| History of fever                       | 214 (97.7) 219       | 65 (97.0) 67        | 110 (95.7) 115       | 7 (100.0) 7        | 2 (100.0) 2        | 0.843 |
| History of rigors                      | 95 (43.6) 218        | 29 (43.3) 67        | 45 (39.5) 114        | 3 (37.5) 8         | 0 (0) 2            | 0.721 |
| History of headache                    | 197 (91.6) 215       | 61 (91.0) 67        | 109 (94.8) 115       | 8 (100.0) 8        | 2 (100.0) 2        | 0.710 |
| History of vomiting                    | 144 (67.0) 215       | 49 (73.1) 67        | 82 (73.1) 115        | 2 (28.6) 7         | 2 (100) 2          | 0.115 |
| Antibiotics given before randomisation | 123 (53.5) 230       | 51 (72.9) 70        | 86 (69.9) 123        | 6 (66.7) 9         | 0 (0) 0            | 0.001 |
| Allocated dexamethasone                | 109 (47.4) 230       | 34 (48.6) 70        | 69 (65.1) 123        | 4 (44.4) 9         | 1 (33.3) 3         | 0.565 |
| Temperature (°c)                       | 38.3 (36.5-41.0) 228 | 38.1 (36.5-41.1) 68 | 38.0 (36.5-41.0) 119 | 38.7 (37.5-40.0) 8 | 37.3 (37.0-37.5) 2 | 0.251 |
| Pulse (/min)                           | 96 (60-170) 227      | 90 (64-130) 67      | 90 (57-160) 119      | 96 (90-120) 8      | 61 (60-62) 2       | 0.020 |
| Systolic blood                         | 120 (75-170) 226     | 120 (90-170) 67     | 120 (90-200) 119     | 135 (100-160) 8    | 120 (110-130) 2    | 0.274 |

|                                                         |                        |                       |                        |                      |                       |       |
|---------------------------------------------------------|------------------------|-----------------------|------------------------|----------------------|-----------------------|-------|
| pressure (mmHg)                                         |                        |                       |                        |                      |                       |       |
| Diastolic blood pressure (mmHg)                         | 70 (35-140) 226        | 70 (46-110) 67        | 70 (40-100) 119        | 80 (60-95) 8         | 65 (60-70) 2          | 0.450 |
| Glasgow coma score (/15)                                | 12 (3-15) 229          | 13 (3-15) 68          | 14 (5-15)              | 14 (7-15) 8          | 15 (15-15) 2          | 0.020 |
| Cranial nerve palsy                                     | 16 (7.0) 230           | 4 (5.7) 70            | 13 (10.6) 123          | 1 (11.1) 9           | 1 (33.3) 3            | 0.325 |
| Rash                                                    | 24 (10.6) 227          | 7 (10.3) 68           | 10 (8.2) 122           | 0 (0) 8              | 0 (0) 2               | 0.805 |
| Haematocrit (%)                                         | 40.5 (27.0-56.0) 214   | 39.0 (26.0-53.0) 64   | 39.1 (20.0-64.4) 111   | 39.1 (30-45.0) 6     | 47.5 (43.0-52.0) 2    | 0.106 |
| Peripheral blood leucocyte count (x10 <sup>3</sup> /ml) | 16395 (3850-80000) 224 | 19950 (2100-39830) 69 | 15700 (3600-41200) 120 | 11800 (9000-16500) 7 | 11125 (10250-12000) 2 | 0.025 |
| Plasma sodium (mmol/l)                                  | 137 (105-150) 216      | 137 (119-154) 68      | 138 (120-154) 111      | 132 (118-146) 7      | 141 (141) 1           | 0.279 |

|                                                         |                     |                    |                         |                  |                    |        |
|---------------------------------------------------------|---------------------|--------------------|-------------------------|------------------|--------------------|--------|
| CSF appearance                                          |                     |                    |                         |                  |                    |        |
| - Clear                                                 | 13 (5.8) 225        | 2 (2.9) 69         | 5 (4.2) 119             | 1 (12.5) 8       | 0 (0) 2            | 0.676  |
| - Cloudy                                                | 209 (92.9) 225      | 67 (97.1) 69       | 110 (92.4) 119          | 7 (87.5) 8       | 2 (100.0) 2        |        |
| - Bloody                                                | 3 (1.3) 225         | 0 (0) 69           | 4 (3.4) 119             | 0 (0) 8          | 0 (0) 0            |        |
| CSF pressure<br>(mmH <sub>2</sub> O)                    | 22 (1-41) 176       | 18 (1-41) 61       | 18 (1-41) 101           | 33 (18-41) 8     | 40 (40) 2          | 0.001  |
| CSF total white<br>cell count<br>(x10 <sup>3</sup> /ml) | 2900 (1-64000) 229  | 4155 (35-33650) 70 | 2900 (136-30500)<br>123 | 670 (210-1705) 9 | 4350 (2690-6000) 2 | 0.014  |
| - Percentage<br>neutrophils                             | 89 (1-99) 226       | 90 (60-99) 70      | 87 (11-99) 123          | 68 (50-84) 9     | 74 (68-80) 2       |        |
| CSF lactate<br>(mmol/l)                                 | 12.8 (1.4-25.7) 200 | 8.7 (3.3-24.0) 61  | 7.1 (1.1-23.3)          | 6.8 (3.3-9.5) 9  | 2.2 (2.1-2.2) 2    | <0.001 |
| CSF Total protein                                       | 279 (20-1518) 226   | 184 (40-990) 68    | 200 (25-1197) 121       | 185 (116-688) 8  | 145 (145) 1        | <0.001 |

|                       |                      |                     |                      |                    |                    |        |
|-----------------------|----------------------|---------------------|----------------------|--------------------|--------------------|--------|
| (mg/dl)               |                      |                     |                      |                    |                    |        |
| CSF:plasma<br>glucose | 0.14 (0.01-0.71) 224 | 0.24 (0.01-0.58) 70 | 0.24 (0.01-0.68) 122 | 0.28 (0.10-0.33) 9 | 0.49 (0.36-0.61) 2 | <0.001 |

**Footnotes:**

a Defined by a positive CSF gram stain, acridine orange stain, or latex agglutination test

b Defined by a positive CSF culture for a pyogenic bacteria with bacteria not detected by gram stain, acridine orange stain, or latex agglutination tests

c Defined by meeting the study entry requirements but without microbiological confirmation of pyogenic meningitis or an alternative diagnosis

d Defined by the culture of *Mycobacterium tuberculosis* from the CSF

e Defined by microbiological or cytological proof of an alternative diagnosis: 2 patients had eosinophilic meningitis, 1 had cryptococcal meningitis

f Categorical variables compared using the Chi squared test; continuous variables compared using the Kruskal-Wallis test
